1           **PipeIT2: A tumor-only somatic variant calling workflow for Molecular**  
2                           **Diagnostic Ion Torrent sequencing data**

3

4   Desiree Schnidrig<sup>1,2\*</sup>, Andrea Garofoli<sup>3\*</sup>, Andrej Benjak<sup>1,2</sup>, Gunnar Rätsch<sup>2,4</sup>, Mark A.  
5   Rubin<sup>1,5</sup>, SOCIBP consortium, Salvatore Piscuoglio<sup>3,6</sup> and Charlotte K. Y. Ng<sup>1,2,5</sup>

6

7   <sup>1</sup>Department for BioMedical Research, University of Bern, Bern, Switzerland

8   <sup>2</sup>SIB Swiss Institute of Bioinformatics, Lausanne, Switzerland

9   <sup>3</sup>Institute of Medical Genetics and Pathology, University Hospital Basel, University of Basel,  
10   Basel, Switzerland

11   <sup>4</sup>Department of Computer Science, ETH Zurich

12   <sup>5</sup>Bern Center for Precision Medicine, Bern, Switzerland

13   <sup>6</sup>Department of Biomedicine, University Hospital Basel, University of Basel, Basel,  
14   Switzerland

15   \*Co-first authors

16

17   **Number of text pages: 12**

18   **Number of tables: 1**

19   **Number of figures: 3**

20   **Running head:** Ion Torrent somatic variants pipeline

21

22   **Grants and other funding sources:** C.K.Y.N. and S.P. were supported by the Swiss  
23   Cancer Research foundation (KFS-4543-08-2018, KFS-4988-02-2020-R, respectively). The  
24   SOCIBP (Swiss Molecular Pathology Breakthrough Platform) is a driver project funded by  
25   the Swiss Personalized Health Network (SPHN). S.P. was supported by the Surgery  
26   Department of the University Hospital Basel and by The Prof. Dr. Max Cloëtta foundation.

27 The funders had no role in study design, data collection, and analysis, decision to publish, or  
28 preparation of the manuscript.

29

30 **Disclosures:** C.K.Y.N. is a consultant for Repare Therapeutics.

31

32 **Correspondence:** Dr. Charlotte K. Y. Ng. Department for BioMedical Research, University  
33 of Bern, Murtenstrasse 40, Bern, 3008, Switzerland. Tel: +41 31 632 8779; E-mail:

34 [charlotte.ng@dbmr.unibe.ch](mailto:charlotte.ng@dbmr.unibe.ch)

35 **ABSTRACT**

36 Precision oncology relies on the accurate identification of somatic mutations in cancer  
37 patients. While the sequencing of the tumoral tissue is frequently part of routine clinical care,  
38 the healthy counterparts are rarely sequenced. We previously published PipelT, a somatic  
39 variant calling workflow specific for Ion Torrent sequencing data enclosed in a Singularity  
40 container. PipelT combines user-friendly execution, reproducibility and reliable mutation  
41 identification, but relies on matched germline sequencing data to exclude germline variants.  
42 Expanding on the original PipelT, here we describe PipelT2 to address the clinical need to  
43 define somatic mutations in the absence of germline control. We show that PipelT2 achieves  
44 a >95% recall for variants with variant allele fraction >10%, reliably detects driver and  
45 actionable mutations and filters out most of the germline mutations and sequencing artifacts.  
46 With its performance, reproducibility and ease of execution, PipelT2 is a valuable addition to  
47 molecular diagnostics laboratories.

48

49

50

51

52

## 53 INTRODUCTION

54 Detection of genomic alterations is becoming a critical component in the standard-of-care in  
55 modern oncology<sup>1,2</sup>. Typically, the detection of genomic alterations is performed using  
56 targeted sequencing panels to profile previously described cancer and actionable gene  
57 regions. The Ion Torrent sequencing platform is frequently used for targeted sequencing in  
58 the diagnostic setting due to its relatively low costs, ability to profile limited genetic material  
59 and rapid turnaround<sup>3</sup>. While Ion Torrent library preparation and sequencing are relatively  
60 straightforward, the methods for sequencing data analysis are not very well-developed. Due  
61 to the technical differences between Ion Torrent and other sequencing platforms, most of the  
62 variant calling tools previously tested, validated and extensively used by the community are  
63 not suited for Ion Torrent data. Ion Torrent sequencing data are typically analyzed on its own  
64 analysis platform Ion Reporter. We and others have reported the high false positive rate of  
65 Ion Reporter analyses, especially for custom panels that lack built-in analysis workflows<sup>4,5</sup>.  
66 Consequently, analyses performed on the Ion Reporter platform typically require extensive  
67 manual review of the results.

68

69 We recently published PipeIT, a pipeline to detect somatic variants in matched tumor-  
70 germline samples from Ion Torrent sequencing data<sup>5</sup>, providing a reliable and automated  
71 workflow to perform variant calling analysis, outperforming a standard Ion Reporter analysis.  
72 We previously benchmarked the variant calling analysis of Ion Reporter using both standard  
73 parameters provided by the manufacturer and a set of optimized parameters. In both cases,  
74 Ion Reporter was indeed able to detect genuine somatic mutations, validated by whole-  
75 exome sequencing and/or Sanger sequencing on two different matched tumor-germline  
76 cohorts), but it also showed the presence of several false positives, notably when the  
77 analysis was performed using the standard, non optimized parameters provided by the  
78 machine<sup>5</sup>. To ensure reproducibility and ease of deployment, PipeIT was built as a

79 Singularity<sup>6</sup> container image file that can be easily executed with a single command, without  
80 the need of additional software other than the Singularity platform.

81

82 The main drawback of PipelT is the need for germline matched control data. When the goal  
83 is to identify somatic mutations, the sequencing of normal controls can be critical in order to  
84 remove germline mutations<sup>1,7,8</sup>. In routine clinical care, however, the sequencing of tumor-  
85 only tissue is often preferred, for time, costs and sample availability reasons. Moreover,  
86 researchers might want to analyze old, archived samples, for which matched germline  
87 controls may not be available. These scenarios significantly limit the contexts where PipelT  
88 can be used and, ultimately, prevent the software from fully achieving its original aim.

89

90 Here we present PipelT2, an extension of PipelT to enable variant calling analyses on tumor  
91 samples without matched germline controls with a single command. PipelT2 identifies and  
92 filters likely germline mutations by leveraging their allele frequencies in population databases  
93 and, if provided, by detecting their presence in unmatched Panel of Normal (PoN) samples.  
94 We demonstrate that PipelT2 was able to detect clinically relevant somatic mutations, while  
95 correctly identifying and removing most of the germline genomic alterations.

96

97

## 98 MATERIALS AND METHODS

### 99 Building the PipelT2 Singularity Container Image

100 The original PipelT Singularity container has been updated to include the PipelT2 tumor-only  
101 workflow. The file is a read-only squashfs file system Singularity image built on a CentOS7  
102 Docker image as a base, as previously described<sup>5</sup>. PipelT2 provides the entry points to  
103 perform both the matched tumor-germline and the new tumor-only workflow. Similar to  
104 PipelT, the new PipelT2 Singularity image provides most of the data needed to perform the  
105 complete analysis, except the population datasets due to file size. The population datasets  
106 can be downloaded with PipelT2 using a utility provided in the Singularity image.

107

### 108 The PipelT2 tumor-only analysis workflow

109 The PipelT2 tumor-only analysis workflow comprises the following steps: 1) variant calling,  
110 2) variant post-processing, 3) variant annotation, 4) read count and quality-based variant  
111 filtering, 5) annotation-based variant filtering and, 6) optionally, PoN-based variant filtering  
112 (**Figure 1**). Due to their likely role in cancer development, hotspot variants are annotated  
113 and whitelisted from all filtering steps<sup>9,10</sup>. This workflow requires a Binary Alignment Map  
114 (BAM)<sup>11</sup> file for the tumor sample from the Ion Torrent Server aligned using the Torrent  
115 Mapping Alignment Program (TMAP) aligner, a Browser Extensible Data (BED)<sup>12</sup> file  
116 defining the target sequenced regions, Annovar<sup>13</sup> annotation files comprising of population  
117 minor allele frequencies, and optionally blacklist BED file and/or a Variant Call Format  
118 (VCF)<sup>14</sup> file containing the mutations found in the PoN. In contrast to the original PipelT  
119 tumor-germline analysis workflow, PipelT2 does not use sequencing data from matched  
120 germline controls.

121

122 Variant calling (step 1) is performed using the Torrent Variant Caller (TVC, v5.12-27 with  
123 tvcutils 5.0-3, Thermo Fisher Scientific) using the same low stringency parameters used in

124 the original PipeIT tumor-germline analysis workflow<sup>5</sup>, packaged in a JSON file within  
125 PipeIT2. Specifically, we use a quality threshold of 6.5, a variant score equal or higher than  
126 10, a minimum coverage of 8 reads for single nucleotide variants (SNVs) and 15 reads for  
127 small insertion/deletions (INDELs) and a variant allele frequency (VAF) of 2% for both SNVs  
128 and INDELs. It is possible to customize the parameters by providing PipeIT2 a JSON file  
129 following the format required by TVC. Some commercially available gene panels come with  
130 a blacklist, consisting of recurrent artifacts identified through the sequencing of normal  
131 samples. The blacklist is typically included in the hotspot BED file and these variants are  
132 tagged with "BSTRAND=F" (on the forward strand), "BSTRAND=R" (on the reverse strand),  
133 or "BSTRAND=B" (on both strands). If a blacklist BED file is provided, it will be used by TVC.  
134 Normalization of the raw variants (step 2, splitting multiallelic into biallelic variants and left-  
135 aligning) is then performed as in PipeIT to facilitate downstream processing.

136

137 In the next step, normalized variants are annotated using snpEff<sup>15</sup> and Annovar<sup>13</sup> (step 3).  
138 Aside from the transcript and protein effects of the variants, PipeIT2 also annotates the  
139 variants with their homopolymer lengths and their minor allele frequencies observed in  
140 populations using data from the 1000 Genomes Project (1KG)<sup>16</sup>, the Exome Aggregation  
141 Consortium (ExAC)<sup>17</sup>, the NHLBI Exome Sequencing Project (ESP)<sup>18</sup> and the Genome  
142 Aggregation Database (GnomAD)<sup>19</sup>. Additionally, variants in mutation hotspot regions<sup>9,10</sup>  
143 [[https://github.com/charlottekyng/cancer\\_hotspots](https://github.com/charlottekyng/cancer_hotspots), last accessed March 9, 2022] are  
144 annotated.

145

146 Variant filtering is then performed in three stages. First, read count and quality-based  
147 filtering (step 4) is performed to remove variants of low confidence. By default, PipeIT2  
148 removes variants with fewer than 20 total reads (corresponding to the INFO field FDP),  
149 fewer than 8 reads supporting the variant (FAO), less than 10% VAF (FAO/FDP), fewer than  
150 3 forward (FSAF) and 3 reverse reads (FSAR), strand bias (FSAF/FSAR) below 0.2 in either

151 direction, a quality score below 15, or variants in homopolymer regions of length greater  
152 than 4 (**Table 1**).

153

154 Second, PipelT2 leverages population data to remove likely germline variants (step 5).  
155 Specifically, variants are removed if they are observed with minor allele frequencies equal to  
156 or higher than 0.5% in any of the four population-level databases 1KG, ExAC, ESP and  
157 GnomAD. Variants with VAF between 0.4 and 0.6, or greater than 0.9 are removed if they  
158 are found at any allele frequency in any of the four population-level datasets.

159

160 Third, as an optional step, PipelT2 can use a user-defined Panel of Normals (PoN) in order  
161 to further reduce the number of likely false positive variants (step 6), including germline  
162 variants not removed in step 5 and systematic sequencing and alignment artifacts. Accepted  
163 inputs are either a pre-generated PoN VCF file or a list of unmatched germline BAM files  
164 from samples sequenced on the same platform as the tumor sample. If a list of BAM files is  
165 provided, PipelT2 automatically calls variants in each of these normal samples as per  
166 variant calling and post-processing steps in the tumor-only workflow. These germline VCF  
167 files are then merged with the GATK 'CombineVariants' function using the UNIQUIFY option  
168 and retaining mutations found in at least two of the input samples.

169

170 The final post-filtering output is returned as a VCF file.

171

## 172 **Evaluation of the PipelT2 tumor-only workflow**

173 Sequencing data from 15 formalin-fixed paraffin-embedded colon adenomas<sup>20</sup> (COAD  
174 cohort) and 10 frozen hepatocellular carcinoma samples<sup>21</sup> (HCC cohort) were retrieved from  
175 our previous publication<sup>5</sup>. The performance of the PipelT2 tumor-only workflow and the  
176 contribution of the PoN-based variant filtering step (step 6 above) was assessed using the  
177 outputs from the tumor-germline workflow as the benchmark. The PoN files used in these



178 analyses were generated from 8 randomly selected unmatched germline samples from the  
179 corresponding cohorts. The mutations detected in PipeIT2 were classified as: true positives  
180 (TP, mutations called by both workflows), false positives (FP, mutations called by the tumor-  
181 only workflow but not the tumor-germline workflow), and false negatives (FN, mutations  
182 detected by the tumor-germline workflow but not the tumor-only workflow). Performance of  
183 PipeIT2 was evaluated as recall (TP/(TP+FN)), precision (TP/(TP+FP)) and F1 score  
184 ( $2 * \text{precision} * \text{recall} / (\text{precision} + \text{recall})$ ).

### 185 **Visualization of BAM files**

186 Integrative Genomics Viewer (IGV)<sup>22</sup> was used to visualize the BAM files and search for the  
187 presence of false positive mutations across the original matched tumor-germline pairs and  
188 the unmatched germline samples used to build the PoN files for these benchmarking  
189 analyses.

190

191 **SOFTWARE AVAILABILITY:** PipeIT2 is available at <https://github.com/ckynlab/PipeIT2>.

192

## 193 **RESULTS**

### 194 **Running the PipeIT2 tumor-only workflow**

195 To provide an effective somatic variant calling analysis on tumor data originated from Ion  
196 Torrent platform in the absence of a matched germline, we updated the original PipeIT  
197 functionality to allow the users to choose between the classic tumor-germline (PipeIT) and  
198 the new tumor-only (PipeIT2) analyses. The PipeIT2 tumor-only workflow (**Figure 1**) can be  
199 executed in a single command as follows:

```
200 singularity run PipeIT.img -t path/to/tumor.bam -e path/to/region.bed -c  
201 path/to/annovar/humandb/folder (-d path/to/PoN/file.vcf)
```

202 Using this command, somatic variants are called with an Ion Torrent-specific variant caller  
203 (TVC), followed by a normalization step to facilitate downstream processing. Raw variant

204 calls are filtered in a multi-step process, specifically optimized to remove likely germline and  
205 artefactual variants in the absence of a matched germline control. Specifically, low  
206 confidence variants are removed with read- and quality-based filters. Then, information from  
207 population sequencing data is leveraged to identify likely germline variants. An optional  
208 panel of unmatched normal samples (PoN) can be used to further reduce the number of  
209 germline and artefactual variants. In order to ensure the detection of known cancer hotspot  
210 variants, they are annotated and whitelisted from all filtering steps<sup>9,10</sup>.

### 211 **Evaluation of the PipelT2 tumor-only workflow**

212 To evaluate the performance of the PipelT2 tumor-only workflow, we analyzed the 10 fresh  
213 frozen hepatocellular carcinoma (HCC) samples and 15 formalin-fixed paraffin-embedded  
214 colon adenomas (COAD) used in our previous publication<sup>5</sup>. The 10 HCCs and their matched  
215 germline were sequenced using a previously published custom HCC targeted sequencing  
216 panel<sup>21</sup> and the 15 COADs with corresponding germline samples using the OncoPrint  
217 Comprehensive Panel v3<sup>23</sup>. We ran the tumor-only workflow with default parameters (**Table**  
218 **1**) to call somatic variants and compared the non-synonymous and *TERT* promoter  
219 mutations to those called using the tumor-germline workflow. To investigate whether the use  
220 of a PoN could improve the performance, for each of the 25 samples, a PoN VCF was  
221 generated from 8 randomly chosen unmatched germline samples (i.e. excluding the  
222 matched germline) of the corresponding cohort. We analyzed each of these 25 samples with  
223 and without the PoN and evaluated the performance of the tumor-only workflow in terms of  
224 precision, recall and F1 value.

225

226 Across the 10 HCC samples, we identified 53 true positive, 11 false positive and 15 false  
227 negative variants (**Figure 2A**). Of the 53 true positive variants, 10 were annotated hotspot  
228 variants. All 11 false positive variants were confirmed as rare germline variants on IGV  
229 (**Supplemental Figures 1 and 2**). Nine of them are the same recurring dinucleotide variant  
230 (DNV) *chr2:21232803:TG>CA* in *APOB*, which upon closer inspection appeared to be 2

231 distinct SNPs - rs584542 (*chr2:21232803:T>C*) and rs1041968 (*chr2:21232804:G>A*) which  
232 were validated as germline by orthogonal whole-exome sequencing<sup>21</sup> (**Supplemental**  
233 **Figure 2**). This variant was also present in the PoN and therefore successfully filtered out in  
234 the PoN analysis (**Supplemental Figure 2**). All 15 false negative variants were removed by  
235 filters specific to the tumor-only workflow to limit the number of artifactual variants. In  
236 particular, 14 variants were below the VAF filtering threshold of 10% and one variant was  
237 located in a homopolymer region of length greater than 4. It is worth mentioning that one of  
238 the HCC samples (HPU207) was previously identified as hypermutated<sup>21</sup> and 13/15 of the  
239 false negative variants were missed in this sample. Overall, the analysis without a PoN  
240 achieved recall, precision and F1 of 0.78, 0.83 and 0.80 respectively (**Figure 2B**). With the  
241 use of a PoN, precision improved to 0.96, resulting in an F1 score of 0.86. When we only  
242 considered variants >10% VAF, a threshold typically used in the molecular diagnostic  
243 setting, the recall increased from 0.78 to 0.98 with an F1 score of 0.90 in the analysis  
244 without a PoN and 0.97 with the additional use of a PoN (**Figure 2B**).

245

246 In the cohort of 15 COADs, we identified 26 true positives, including 19 hotspot variants, as  
247 well as 12 false positive and 12 false negative variants (**Figure 2A**). Most (9/12) false  
248 positive variants were confirmed as rare germline variants, including one that was  
249 successfully removed in the PoN analysis. Another two artifactual variants were present in  
250 the respective PoNs and hence successfully filtered out in the PoN analysis. Similar to the  
251 analysis of the HCC cohort, nearly all (11/12) false negative variants were filtered out due to  
252 their low allele frequency (VAF <10%). The remaining false negative variant was removed  
253 due to its strand-bias. Without the use of a PoN, the recall, precision and F1 score were all  
254 0.68, while the precision increased to 0.74 (F1=0.71) with the use of a PoN (**Figure 2B**).  
255 Excluding variants with VAF<10%, the recall was 0.96, increasing the F1 score to 0.80 and  
256 0.84 in the analysis with and without PoN, respectively (**Figure 2B**).

257

258 Overall, PipelT's recall of variants with a VAF  $\geq 10\%$  was nearly perfect, with only one variant  
259 missed in each cohort. Misclassification of rare germline variants as somatic was the main  
260 reason for false positive variants (20/23; 87%) and represents a known limitation of tumor-  
261 only variant calling. The additional use of a PoN has helped to reduce the overall number of  
262 false positives by 52% (12/23).

263

### 264 **Evaluation of the PipelT2 tumor-only workflow in a clinical context**

265 To evaluate whether the PipelT2 tumor-only workflow would detect clinically and biologically  
266 significant variants, we used oncoKB<sup>24</sup> to annotate the oncogenicity and clinical actionability  
267 (levels 1-3, namely FDA-approved drugs, standard care and clinical evidence) of the  
268 variants. Across both cohorts, the PipelT2 tumor-only workflow successfully detected all  
269 cancer hotspot variants. In the HCC cohort, we detected the known oncogenic *TERT*  
270 promoter (c.-150C>T) and *CTNNB1* (p.S33C; p.T41A) mutations, likely oncogenic variants in  
271 *CTNNB1* (p.D32A; p.S37C) and likely oncogenic truncating variants in *ARID1A* (p.Y128\*;  
272 p.S255fs), *ATM* (p.C117\*), *AXIN1* (p.Q559\*), *RB1* (p.E545\*) and *TP53* (p.C135\*; **Figure**  
273 **3A**). In the COAD cohort, PipelT2 identified several targetable oncogenic variants such as a  
274 *KRAS* p.G12C and *BRAF* p.V600E, as well as mutations linked to anti-EGFR resistance  
275 such as the *KRAS* and *NRAS* p.Q61K variants (**Figure 3B**). In addition, oncogenic variants  
276 in *BRAF* (p.N581I), *CTNNB1* (p.T41A; p.S45A) and *PIK3CA* (p.C420R), a likely oncogenic  
277 truncating variant in *ARID1A* (p.Y815fs) and a likely oncogenic variant in *KDR* (p.C482R)  
278 were also identified.

279

280 Among the 23 false positive variants (11 in the HCC cohort and 12 in the COAD cohort), 20  
281 were germline variants in genes such as *APOB* and *NOTCH2*, of which 10 were removed  
282 with the PoN (**Figure 3**). Of the remaining three false positives, two were likely sequencing  
283 artifacts which were filtered out with the PoN and one was likely an artifact. All 27 false

284 negative variants were low VAF variants. Of those, 25 had a VAF <10% and the remaining  
285 two had a VAF between 10% and 15%. Only five of these low-VAF variants, *ATM* (p.E281\*),  
286 *HNF1A* (p.G375fs) and *KEAP1* (p.R554\*) in the HCC cohort and *CDK12* (p.S133fs) and  
287 *CDKN1B* (p.R152fs) in the COAD cohort are likely oncogenic but none of them was reported  
288 as potential resistance variant.

289

## 290 **DISCUSSION**

291 Precision oncology care is increasingly reliant on the identification of somatic DNA  
292 alterations in cancer patients. DNA sequencing of tumor tissues with targeted genomic  
293 assays represents, to date, the best means to retrieve this information<sup>25,26</sup>. Furthermore, the  
294 additional sequencing of a healthy tissue sample from the same cancer patient is the  
295 definitive way to determine which of the genetic alterations found in the tumor tissue are  
296 likely somatic<sup>8</sup>.

297

298 Ion Torrent is one of the most popular sequencing platforms in the routine diagnostic setting  
299 due to its low costs and low sample input requirements, but the proprietary Ion Reporter  
300 software requires a paid license and lacks a streamlined data analysis, particularly for  
301 custom target panels. We previously developed PipeIT, a somatic variant calling workflow  
302 specific for Ion Torrent sequencing data enclosed in a Singularity image file<sup>5</sup>. The strength of  
303 PipeIT lies in its ease of deployment and use, reproducible results, and demonstrated  
304 accuracy. On the other hand, the need for tumor-germline matched sequencing data limits  
305 the use of PipeIT in the clinical setting where germline samples are frequently not  
306 sequenced. The main reasons for the lack of sequencing data of a matched normal sample  
307 are time, costs and sample availability. To address this shortcoming, we developed PipeIT2,  
308 a Singularity container which contains the original PipeIT tumor-germline workflow and an  
309 additional tumor-only workflow.

310

311 To overcome the challenges associated with the lack of a matched germline control, PipelT2  
312 leverages three filtering steps. The first filter relies on more stringent filtering thresholds  
313 compared to those used in the tumor-germline workflow, including a VAF threshold of 10%,  
314 compared to the previous 5%, and additional strand-bias and homopolymer filters. The  
315 second makes use of data obtained from the 1KG<sup>16</sup>, ExAC<sup>17</sup>, ESP<sup>18</sup> and the GnomAD<sup>19</sup>.  
316 Mutations detected in at least 0.5% (or any other user-defined percentage) of the samples in  
317 any of these databases are removed from the final output. The last filter is the optional PoN  
318 filter, which consists of user-defined mutations obtained from unmatched normal samples or  
319 otherwise blacklisted variants. This third step is not mandatory, to enable the use of the  
320 tumor-only workflow even if there are no unmatched germline samples available.

321

322 To evaluate the performance of PipelT2, the mutations identified by PipelT2 from 10 HCCs  
323 and 15 COADs were compared to the ones identified by the tumor-germline workflow. Using  
324 panels of 8 randomly chosen unmatched normal samples for each tumor sample, a total of  
325 79 non-synonymous or *TERT* promoter mutations, including several important clinical  
326 biomarkers, were correctly detected across the two cohorts. These include targetable  
327 mutations such as *KRAS* p.G12C and *BRAF* p.V600E, several mutations implicated in anti-  
328 EGFR resistance such as the *KRAS* and *NRAS* p.Q61K variants and various known  
329 oncogenic variants in genes such as *BRAF*, *CTNNB1*, *PIK3CA* and *TERT*. Nevertheless, 27  
330 mutations were mistakenly removed from the PipelT2 output. The primary reason for the  
331 removal (25/27; 93%) was the low allele fraction of these mutations. This is a result of the  
332 more stringent VAF-based filtering in the tumor-only workflow which is necessary to limit the  
333 number of false positive calls in the absence of a matched germline sample. Given that  
334 clinically important resistance mechanisms typically involve recurrent hotspots and PipelT2  
335 actively whitelists such hotspot mutations, these mutations would still be identified even if  
336 they are found at low VAF.

337

338 By providing a variant calling analysis able to detect somatic mutations in tumor samples  
339 lacking a matched germline control, PipeIT2 offers an important improvement over the  
340 original PipeIT workflow. Thanks to filters based on population allele frequencies and  
341 variants found in panels of unmatched germline samples, PipeIT2 was able to detect most of  
342 the somatic mutations previously identified in the matched tumor-germline analysis,  
343 including several important clinical biomarkers. In conclusion, PipeIT2 offers a powerful, user  
344 friendly and easily reproducible tool specific for Ion Torrent targeted sequencing analyses.

345

#### 346 **ACKNOWLEDGMENTS**

347 Development of PipeIT2 was performed at the Leonhard Med platform at ETH Zurich and  
348 the sciCORE scientific computing center at University of Basel.

349

#### 350 **AUTHOR CONTRIBUTIONS**

351 S.P. and C.K.Y.N. conceived and supervised the study. D.S., A.G., A.B., the SOCIBP  
352 consortium and C.K.Y.N. developed the methodology. G.R and M.A.R. provided critical  
353 review of the results. D.S., A.G. and C.K.Y.N. interpreted the results and wrote the  
354 manuscript. All authors agreed to the final version of the manuscript.

355

356 Members of the SOCIBP consortium: Andrej Benjak, Andre Kahles, Charlotte K. Y. Ng,  
357 Salvatore Piscuoglio, Gunnar Rätsch, Mark A. Rubin, Desiree Schnidrig, Senija Selimovic-  
358 Hamza

359

360

361

362 **TABLES**

363 **Table 1.** Filtering parameters and default values of the tumor-only workflow.

364

| Parameter              | Description                                                                                                     | Default value |
|------------------------|-----------------------------------------------------------------------------------------------------------------|---------------|
| --min_supporting_reads | Minimum number of reads supporting the variant                                                                  | 8             |
| --min_tumor_depth      | Minimum read depth at the locus                                                                                 | 20            |
| --min_allele_fraction  | Minimum allele fraction (i.e. the number of read supporting the variant divided by the read depth at the locus) | 0.1           |
| --homopolymer_run      | Maximum homopolymer region length                                                                               | 4             |
| --max_pop_af           | Maximum frequency of mutation in population databases                                                           | 0.005         |
| --quality              | Minimum quality score                                                                                           | 15            |

365

366

367 **FIGURE LEGENDS**

368 **Figure 1. Overview of the PipeIT2 tumor-only workflow.** Flowchart showing the steps of  
369 the workflow. The workflow takes the BAM file for the tumor sample, the BED file for the  
370 target regions, the Annovar datasets for the population databases and, optionally, a Panel of  
371 Normals. Variant calling is then performed using the Torrent Variant Caller with the  
372 packaged parameters file. Mutations are filtered based on read count and quality, population  
373 frequencies and, when provided, the Panel of Normals. The output is returned as a VCF file.

374

375 **Figure 2. Performance evaluation of PipeIT2. (A)** Barplots showing the number of true  
376 positive (TP), false positive (FP) and false negative (FN) variants in the (left) HCC and (right)  
377 COAD cohorts. Mutation classification is indicated in the color key. **(B)** Heatmaps showing  
378 the recall, precision and F1 of PipeIT2 in a VAF range of (left) 1%-100% ('all variants') and  
379 (right) 10%-100% in the (top) HCC and (bottom) COAD cohorts. Boxes are colored  
380 according to the color key.



381

382 **Figure 3. Variants detected by PipeIT2.** Oncoprints of the variants called in the **(A)** HCC  
383 and **(B)** COAD cohorts. Variant types are color-coded as indicated in the color key. Multiple  
384 variant types indicate multiple variants of different types. False positive mutations are  
385 marked with a dot. Red dots indicate likely sequencing artifacts found in the PoN, yellow  
386 dots indicate confirmed germline variants found in the PoN, gray dots indicate confirmed  
387 germline variants absent in the PoN and black dots indicate other false positive mutations.  
388 False negative mutations are highlighted with an empty square if their VAF is <10% and with  
389 a filled square if  $\geq 10\%$ .

390

391

392

## 393 REFERENCES

- 394 1. Vogelstein B, Papadopoulos N, Velculescu VE, Zhou S, Diaz LA Jr, Kinzler KW. Cancer  
395 genome landscapes. *Science*, 2013, 339:1546–58
- 396 2. Garraway LA, Verweij J, Ballman KV. Precision oncology: an overview. *J Clin Oncol*,  
397 2013, 31:1803–5
- 398 3. Singh RR, Patel KP, Routbort MJ, Reddy NG, Barkoh BA, Handal B, Kanagal-  
399 Shamanna R, Greaves WO, Medeiros LJ, Aldape KD, Luthra R. Clinical validation of a  
400 next-generation sequencing screen for mutational hotspots in 46 cancer-related genes.  
401 *J Mol Diagn*, 2013, 15:607–22
- 402 4. Deshpande A, Lang W, McDowell T, Sivakumar S, Zhang J, Wang J, San Lucas FA,  
403 Fowler J, Kadara H, Scheet P. Strategies for identification of somatic variants using the  
404 Ion Torrent deep targeted sequencing platform. *BMC Bioinformatics*, 2018, 19:5
- 405 5. Garofoli A, Paradiso V, Montazeri H, Jermann PM, Roma G, Tornillo L, Terracciano LM,  
406 Piscuoglio S, Ng CKY. PipelIT: A Singularity Container for Molecular Diagnostic Somatic  
407 Variant Calling on the Ion Torrent Next-Generation Sequencing Platform. *J Mol Diagn*,  
408 2019, 21:884–94
- 409 6. Kurtzer GM, Sochat V, Bauer MW. Singularity: Scientific containers for mobility of  
410 compute. *PLoS One*, 2017, 12:e0177459
- 411 7. Oh S, Geistlinger L, Ramos M, Morgan M, Waldron L, Riester M. Reliable Analysis of  
412 Clinical Tumor-Only Whole-Exome Sequencing Data. *JCO Clin Cancer Inform*, 2020,  
413 4:321–35
- 414 8. Schrader KA, Cheng DT, Joseph V, Prasad M, Walsh M, Zehir A, Ni A, Thomas T,  
415 Benayed R, Ashraf A, Lincoln A, Arcila M, Stadler Z, Solit D, Hyman DM, Zhang L,  
416 Klimstra D, Ladanyi M, Offit K, Berger M, Robson M. Germline Variants in Targeted  
417 Tumor Sequencing Using Matched Normal DNA. *JAMA Oncology*, 2016, 2:104–11
- 418 9. Chang MT, Asthana S, Gao SP, Lee BH, Chapman JS, Kandoth C, Gao J, Socci ND,  
419 Solit DB, Olshen AB, Schultz N, Taylor BS. Identifying recurrent mutations in cancer  
420 reveals widespread lineage diversity and mutational specificity. *Nat Biotechnol*, 2016,  
421 34:155–63
- 422 10. Gao J, Chang MT, Johnsen HC, Gao SP, Sylvester BE, Sumer SO, Zhang H, Solit DB,  
423 Taylor BS, Schultz N, Sander C. 3D clusters of somatic mutations in cancer reveal  
424 numerous rare mutations as functional targets. *Genome Med*, 2017, 9:4
- 425 11. Li H, Handsaker B, Wysoker A, Fennell T, Ruan J, Homer N, Marth G, Abecasis G,  
426 Durbin R, 1000 Genome Project Data Processing Subgroup. The Sequence  
427 Alignment/Map format and SAMtools. *Bioinformatics*, 2009, 25:2078–9
- 428 12. Quinlan AR, Hall IM. BEDTools: a flexible suite of utilities for comparing genomic  
429 features. *Bioinformatics*, 2010, 26:841–2
- 430 13. Wang K, Li M, Hakonarson H. ANNOVAR: functional annotation of genetic variants from  
431 high-throughput sequencing data. *Nucleic Acids Res*, 2010, 38:e164
- 432 14. Danecek P, Auton A, Abecasis G, Albers CA, Banks E, DePristo MA, Handsaker RE,  
433 Lunter G, Marth GT, Sherry ST, McVean G, Durbin R, 1000 Genomes Project Analysis  
434 Group. The variant call format and VCFtools. *Bioinformatics*, 2011, 27:2156–8
- 435 15. Cingolani P, Platts A, Wang LL, Coon M, Nguyen T, Wang L, Land SJ, Lu X, Ruden  
436 DM. A program for annotating and predicting the effects of single nucleotide  
437 polymorphisms, SnpEff: SNPs in the genome of *Drosophila melanogaster* strain w1118;  
438 iso-2; iso-3. *Fly*, 2012, 6:80–92
- 439 16. Consortium T 1000 GP, The 1000 Genomes Project Consortium. A global reference for  
440 human genetic variation. *Nature*, 2015, 526:68–74
- 441 17. Karczewski KJ, Weisburd B, Thomas B, Solomonson M, Ruderfer DM, Kavanagh D,  
442 Hamamsy T, Lek M, Samocha KE, Cummings BB, Birnbaum D, The Exome  
443 Aggregation Consortium, Daly MJ, MacArthur DG. The ExAC browser: displaying  
444 reference data information from over 60 000 exomes. *Nucleic Acids Res*, 2017,  
445 45:D840–5

- 446 18. Fu W, O'Connor TD, Jun G, Kang HM, Abecasis G, Leal SM, Gabriel S, Rieder MJ,  
447 Altshuler D, Shendure J, Nickerson DA, Bamshad MJ, NHLBI Exome Sequencing  
448 Project, Akey JM. Analysis of 6,515 exomes reveals the recent origin of most human  
449 protein-coding variants. *Nature*, 2013, 493:216–20
- 450 19. Karczewski KJ, Francioli LC, Tiao G, Cummings BB, Alföldi J, Wang Q, Collins RL,  
451 Laricchia KM, Ganna A, Birnbaum DP, Gauthier LD, Brand H, Solomonson M, Watts  
452 NA, Rhodes D, Singer-Berk M, England EM, Seaby EG, Kosmicki JA, Walters RK,  
453 Tashman K, Farjoun Y, Banks E, Poterba T, Wang A, Seed C, Whiffin N, Chong JX,  
454 Samocha KE, Pierce-Hoffman E, Zappala Z, O'Donnell-Luria AH, Minikel EV, Weisburd  
455 B, Lek M, et al. The mutational constraint spectrum quantified from variation in 141,456  
456 humans. *Nature*, 2020, 581:434–43
- 457 20. Piscuoglio S, Ng CKY, Murray MP, Guerini-Rocco E, Martelotto LG, Geyer FC, Bidard  
458 F-C, Berman S, Fusco N, Sakr RA, Eberle CA, De Mattos-Arruda L, Macedo GS, Akram  
459 M, Baslan T, Hicks JB, King TA, Brogi E, Norton L, Weigelt B, Hudis CA, Reis-Filho JS.  
460 The Genomic Landscape of Male Breast Cancers. *Clin Cancer Res*, 2016, 22:4045–56
- 461 21. Paradiso V, Garofoli A, Tosti N, Lanzafame M, Perrina V, Quagliata L. Diagnostic  
462 targeted sequencing panel for hepatocellular carcinoma genomic screening. *J Mol*  
463 *Diagn*, 2018, 20:836–48
- 464 22. Thorvaldsdóttir H, Robinson JT, Mesirov JP. Integrative Genomics Viewer (IGV): high-  
465 performance genomics data visualization and exploration. *Brief Bioinform*, 2013,  
466 14:178–92
- 467 23. Tornillo L, Lehmann FS, Garofoli A, Paradiso V, Ng CKY, Piscuoglio S. The Genomic  
468 Landscape of Serrated Lesion of the Colorectum: Similarities and Differences With  
469 Tubular and Tubulovillous Adenomas. *Front Oncol*, 2021, 11:668466
- 470 24. Chakravarty D, Gao J, Phillips SM, Kundra R, Zhang H, Wang J, Rudolph JE, Yaeger  
471 R, Soumerai T, Nissan MH, Chang MT, Chandarlapaty S, Traina TA, Paik PK, Ho AL,  
472 Hantash FM, Grupe A, Baxi SS, Callahan MK, Snyder A, Chi P, Danila D, Gounder M,  
473 Harding JJ, Hellmann MD, Iyer G, Janjigian Y, Kaley T, Levine DA, Lowery M, Omuro A,  
474 Postow MA, Rathkopf D, Shoushtari AN, Shukla N, et al. OncoKB: A Precision  
475 Oncology Knowledge Base. *JCO Precis Oncol*, 2017, 2017
- 476 25. Kruglyak KM, Lin E, Ong FS. Next-generation sequencing in precision oncology:  
477 challenges and opportunities. *Expert Review of Molecular Diagnostics*, 2014, 14:635–7
- 478 26. Kadri S, Long BC, Mujacic I, Zhen CJ, Wurst MN, Sharma S, McDonald N, Niu N,  
479 Benhamed S, Tuteja JH, Seiwert TY, White KP, McNerney ME, Fitzpatrick C, Wang YL,  
480 Furtado LV, Segal JP. Clinical Validation of a Next-Generation Sequencing Genomic  
481 Oncology Panel via Cross-Platform Benchmarking against Established Amplicon  
482 Sequencing Assays. *J Mol Diagn*, 2017, 19:43–56

483

**Figure 1**

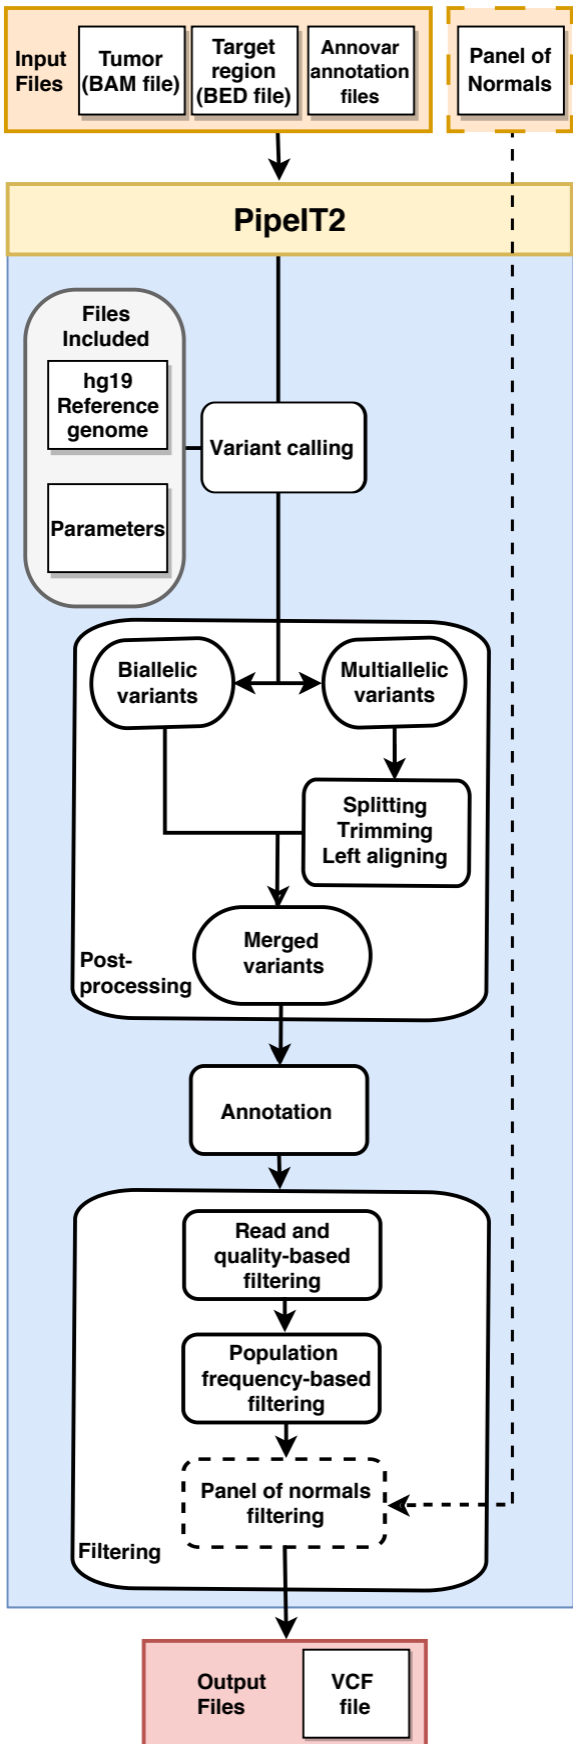

**Figure 2**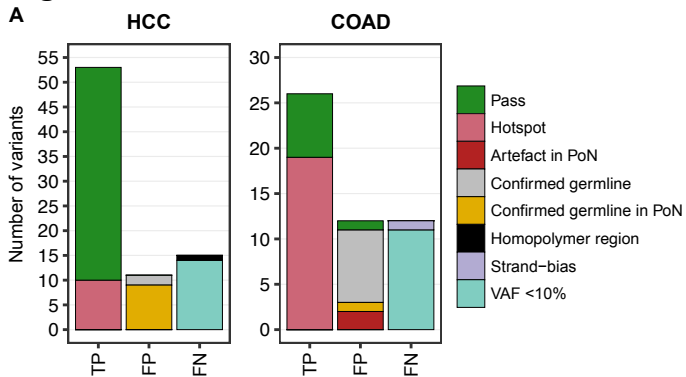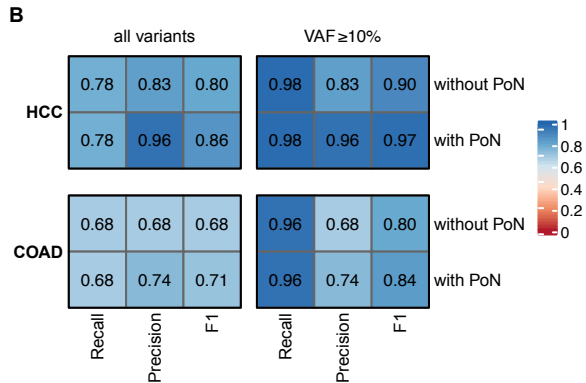

**Figure 3****A****HCC**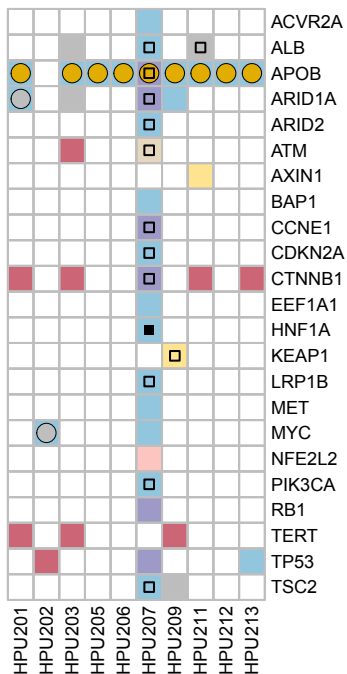**B****COAD**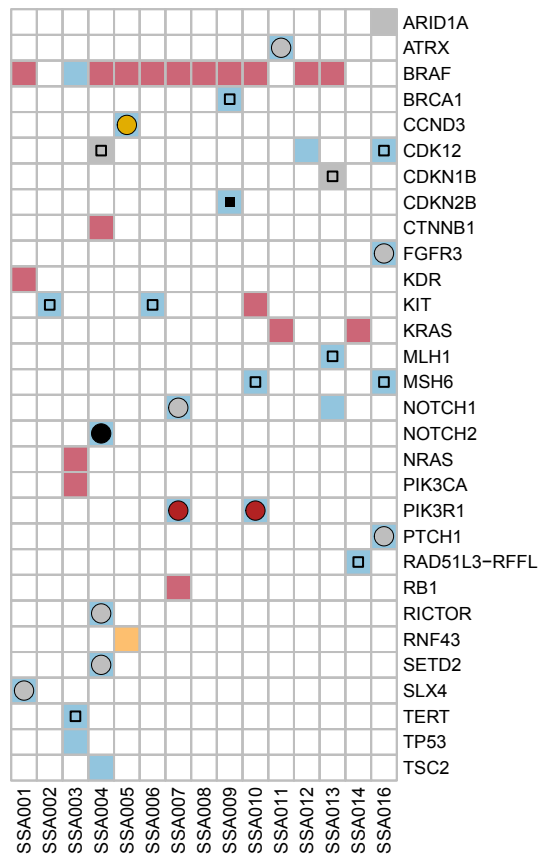**Variant type**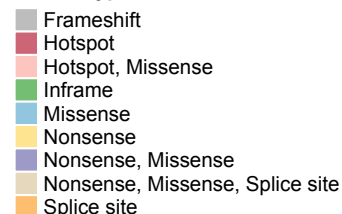**Variant info**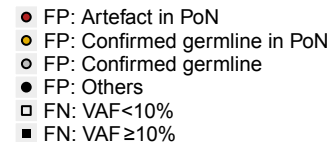

Source: https://www.biorxiv.org/content/10.1101/2022.06.28.497937v1.full.pdf
